# Supplementary material for: Scanning electron microscopy (SEM) reveals high diversity of setae on the hind tibiae and basitarsi of Peruvian Stingless Bees (Apidae: Meliponini)
Source: PeerJ. 2025 Oct 9;13:e19749. doi: 10.7717/peerj.19749 (PMC12515428; doi:10.7717/peerj.19749)
Supplement: Supplemental Information 11 — Raw data. Unit of measurement: µm. [file peerj-13-19749-s011.xlsx]

## Sheet: Hind tibiae and basitarsi
		M. cf. eburnea		P. testacea		S. cf. latitarsis		T. dallatorreana		T. cf. atomaria		T. cf. hypogea		Lestrimelitta sp.
	Hind tibia (TL|TB)	3079.3	1062	2234.7	1094.8	1538.5	620.3	2501.9	846.4	862.9	265.8	2568.7	764.2	1683.4	560.2
	Hind basitarsus (BL|BW)	1263.8	646	1122.4	601.1	1080	495.3	908	489	247.2	176.6	965	547.7	878.9	288.9

## Sheet: Setae
Species	SETAL TYPES
	Simple setae (µm)					Branched setae (µm)
	ns	ts	hs1	hs2	hs3	sp	pe1	pe2	pl	de1	de2	de3
Lestrimelitta sp.	22,3-71,0	59,7-112,1				122,6-208,5		105,9-131,7	54,7-59,3	50,3-49,2
M. cf. eburnea	35,7-84,9	118,3-222,2	86,5-130,0		77,2-755,4						79,1-106,2	111,5-145,5
P. testacea	32,5-58,5	89,6-124,5	68,4-131,7	1047-263,24	89,5-896,7	196,7-518,2						64,7-106,8
S. cf. latitarsis	24,5-29,3	39,1-94,3	74,8-139,6		43,8-333,7	41,9-64,6		41,9-55,5	47,3-82,8	24,8-25,0
T. dallatorreana	88,0-96,0	202,3-310,9	29,7-48,8		33,3-384,5	56,6-264,3	126,7-172,8	104,1-435,8		42,2-92,1
T. cf. hypogea	68,7-73,6	116,4-129,0		274,5-289,5	75,-392,3	154,0-292,4	103,5-116,1	38,7-262,1		33,7-54,7		62,1-77,3
T. cf. atomaria	9,1-15,0	40,3-48,7			30,9-270,1					16,2-40,1	7,2-24,1

## Sheet: Penicilla+Rastella
	Species	Inf. Parapenicillum	Sup. parapenicillum	Penicillum	Rastellum
	T. dallatorreana	388.7	380
	T. cf. hypogea	130.3			111.067
	T. cf. atomaria	63.7333	205.933
	Lestrimelitta sp.	171.333
	M. cf. eburnea		564.967
	P. testacea		335.833
	S. cf. latitarsis		295.567

## Sheet: Keirotrichia
	Keirotrichia	Lengths (µm)			Average	SD
	ke1	58.3	71.8	55.7	61.9333	7.1
	ke2	66.7	61	57.4	61.7	3.8
	ke3	35.2	36.3	25.4	32.3	4.9
	ke4	125.1	73.5	127	108.533	24.8
	ke5	30.5	25.9	30.5	28.9667	2.2
	ke6	51.3	48.8	47.7	49.2667	3.9
	ke7	63.1	58.4	62	61.1667	2

## Sheet: Pollen brush
	Species	Pollen brush
		pb
	Lestrimelitta sp.	64,8-121,7
	M. cf. eburnea	84,8-349,8
	P. testacea	142,0-290,3
	S. cf. latitarsis	51,6-106,9
	T. dallatorreana	88,8-563,2
	T. cf. hypogea	46,6-174,9
	T. cf. atomaria	16,6-52,2

## Sheet: Sericeus area
	Species	SA
	T. dallatorreana	18,6-21,8
	T. cf. hypogea	19,8-20,5
